# Supplementary material for: A nonsense mutation in the DNA repair factor Hebo causes mild bone marrow failure and microcephaly
Source: PubMed Central journal article supplement — J Exp Med. 2016 May 30;213(6):1011–28. doi: 10.1084/jem.20151183 (PMC4886357; doi:10.1084/jem.20151183), 2016-05-30
Supplement: supp_jem.20151183_JEM_20151183_sm.pdf [file supp_jem.20151183_JEM_20151183_sm.pdf]

SUPPLEMENTAL MATERIAL

Zhang et al., <http://www.jem.org/cgi/content/full/jem.20151183/DC1>

Table S1. **Biological characteristics of patient**

| Characteristics | Age                            |                                 | Reference values                   |
|-----------------|--------------------------------|---------------------------------|------------------------------------|
|                 | 13 y                           | 20 y                            |                                    |
| Bone marrow     | Reduced cellularity            | Reduced cellularity             |                                    |
| Platelets       | $4 \times 10^9/\text{liter}$   | $59 \times 10^9/\text{liter}$   | 150–400 $\times 10^9/\text{liter}$ |
| Hemoglobin      | 90 g/liter                     | 120 g/liter                     | 125–170 g/liter                    |
| Red cell volume | 104 fl                         | 104 fl                          | 80–100 fl                          |
| Reticulocytes   | $33 \times 10^9/\text{liter}$  | $75 \times 10^9/\text{liter}$   | 20–80 $\times 10^9/\text{liter}$   |
| Neutrophil      | $0.7 \times 10^9/\text{liter}$ | $1.04 \times 10^9/\text{liter}$ | 1.5–7.5 $\times 10^9/\text{liter}$ |
| Lymphocytes     | $1.4 \times 10^9/\text{liter}$ | $1.47 \times 10^9/\text{liter}$ | 1–4 $\times 10^9/\text{liter}$     |

fl =  $10^{-15}$  liters.
